# Supplementary material
Source: PubMed Central journal article supplement (PMC4947812)
Supplement: cmi201517x1.pdf [file cmi201517x1.pdf]

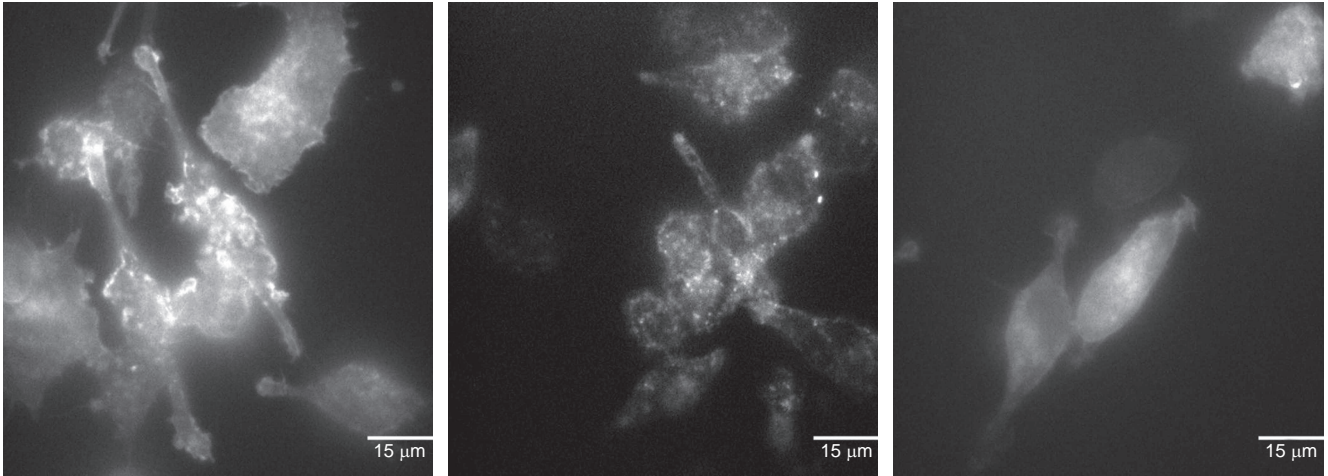

**Movies 1, 2 and 3** In DC2.4 cells overexpressing WT, ARF6 resided predominantly at the plasma membrane and some endosomal compartments (Movie 1). Cells overexpressing CA mutant ARF6-Q67L (defective in GTP hydrolysis) showed enlarged endosomal structures, characteristic of a blockade in transport of ARF6 cargo on the way to early endosomes (Movie 2). In contrast, these enlarged endosomal structures were not observed in cells expressing DN mutant ARF6-T27N (defective in GTP binding, Movie 3). It has been reported that ARF6-T27N localized exclusively to tubulovesicular structures in Hela cells. We observed some ARF6-T27N compartments in cytoplasm, but the tubulovesicular structures were not as obvious as reported in Hela, possibly because of differences in cell types or limited microscopy resolution.

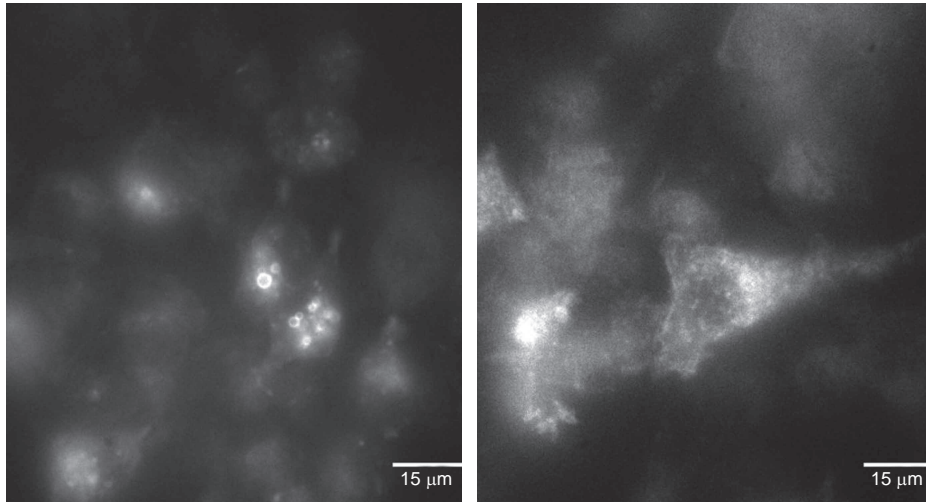

**Movies 4 and 5** Identical to movies 1, 2 and 3 except that mCherry-tagged WT and CA mutant of Rab22a were used for transfection in place of ARF6 mutants.

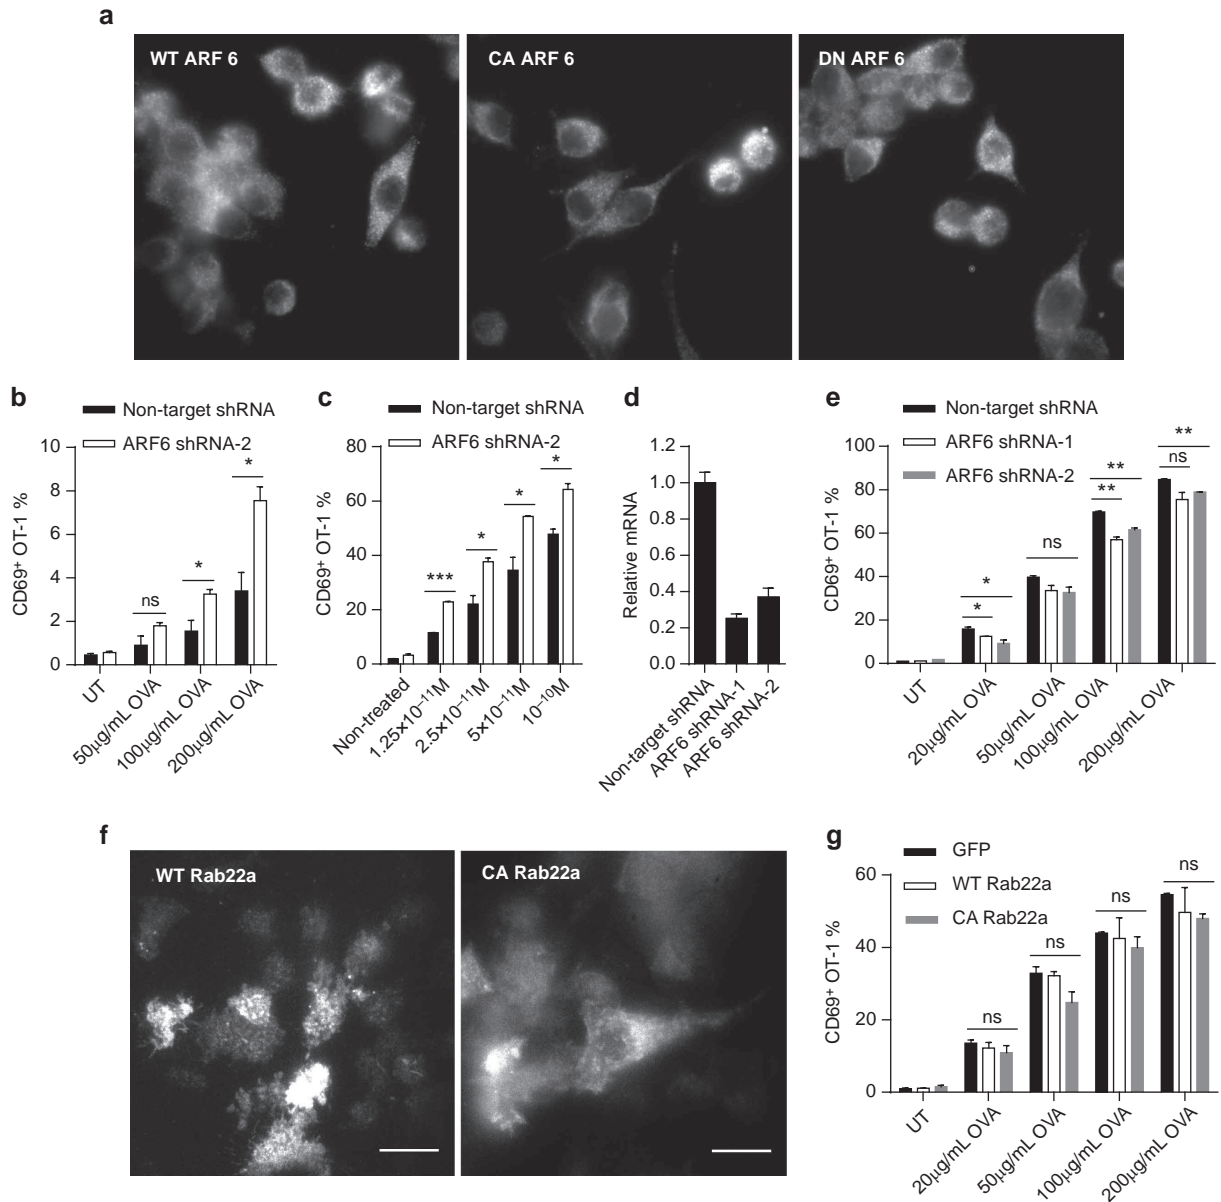

**Supplemental Figure 1** (a) DC2.4 cells overexpressing C-terminal mCherry-tagged WT, CA or DN ARF6 were fixed and probed with anti-H-2Kb antibody followed by the Alexa 488 Donkey Anti-Mouse IgG. (b) Identical to Figure 1e except that DCs were fixed with PFA prior to the cross-presentation assay. (c) DC2.4 cells expressing non-target or ARF6 shRNA were stimulated with SIINFEKL at the indicated concentrations for 4 h and then the fixed DC2.4 cells were cocultured with OT-1 cells for 24 h. (d) shRNA ARF6 knockdown efficiency in DC1940 cells. (e) Identical to Figure 1e, except that DC1940 cells were used in place of DC2.4 cells. (f) WT or CA Rab22a-overexpressing DC2.4 cells were processed for live imaging as in Figure 1a. (g) WT and CA Rab22a overexpressing cells were analyzed for the crosspresentation as in Figure 1c.
